# Supplementary material for: Genome-Wide Identification and Expression Analysis of Respiratory Burst Oxidase Homolog (RBOH) Gene Family in Eggplant (Solanum melongena L.) under Abiotic and Biotic Stress
Source: MDPI journal article supplement (doi:10.3390/genes14091665), 2023-08-23
Supplement: s1 [file s1]

**Table S1** The *RBOH* genes ID of eggplant, tomato, rice and Arabidopsis

| <i>Solanum melongena</i> |               | <i>Solanum lycopersicum</i> [8] |                | <i>Oryza sativa</i> [7] |              | <i>Arabidopsis thaliana</i> [7] |           |
|--------------------------|---------------|---------------------------------|----------------|-------------------------|--------------|---------------------------------|-----------|
| Gene name                | Gene ID       | Gene name                       | Gene ID        | Gene name               | Gene ID      | Gene name                       | Gene ID   |
| <i>SmRBOHA</i>           | Smechr0802427 | <i>SIRBOH1</i>                  | Solyc06g068680 | <i>OsRBOHA</i>          | Os01g0734200 | <i>AtRBOHA</i>                  | At5g07390 |
| <i>SmRBOHB</i>           | Smechr0101010 | <i>SIRBOH2</i>                  | Solyc03g117980 | <i>OsRBOHB</i>          | Os01g0360200 | <i>AtRBOHB</i>                  | At1g09090 |
| <i>SmRBOHC</i>           | Smechr0303236 | <i>SIRBOH3</i>                  | Solyc01g099620 | <i>OsRBOHC</i>          | Os05g0528000 | <i>AtRBOHC</i>                  | At5g51060 |
| <i>SmRBOHD</i>           | Smechr0602302 | <i>SIRBOH4</i>                  | Solyc05g025680 | <i>OsRBOHD</i>          | Os05g0465800 | <i>AtRBOHD</i>                  | At5g47910 |
| <i>SmRBOHE1</i>          | Smechr0500887 | <i>SIRBOH5</i>                  | Solyc07g042460 | <i>OsRBOHE</i>          | Os01g0835500 | <i>AtRBOHE</i>                  | At1g19230 |
| <i>SmRBOHE2</i>          | Smechr0701288 | <i>SIRBOH6</i>                  | Solyc06g075570 | <i>OsRBOHF</i>          | Os08g0453700 | <i>AtRBOHF</i>                  | At1g64060 |
| <i>SmRBOHH1</i>          | Smechr0602858 | <i>SIRBOH7</i>                  | Solyc11g072800 | <i>OsRBOHG</i>          | Os09g0438000 | <i>AtRBOHG</i>                  | At4g25090 |
| <i>SmRBOHH2</i>          | Smechr1201509 |                                 |                | <i>OsRBOHH</i>          | Os12g0541300 | <i>AtRBOHH</i>                  | At5g60010 |
|                          |               |                                 |                | <i>OsRBOHI</i>          | Os11g0537400 | <i>AtRBOHI</i>                  | At4g11230 |
|                          |               |                                 |                |                         |              | <i>AtRBOHJ</i>                  | At3g45810 |

**Table S3** The primer of *SmRBOHs*-qPCR

| Gene name             | Forward primer (5'-3')   | Reverse primer (5'-3')   |
|-----------------------|--------------------------|--------------------------|
| <i>SmRBOHA</i> -qPCR  | TTCCGTCAGTTTTACAGGA      | GAAAAACGACGTCGGAGAAA     |
| <i>SmRBOHB</i> -qPCR  | TAAGTCTGGTGCTGCTCGTG     | AACCGCAAGTTCATCGAATC     |
| <i>SmRBOHC</i> -qPCR  | TAATCACTCGCACCACCATC     | TTTTCCGCCTCGTTTGTT       |
| <i>SmRBOHD</i> -qPCR  | CACAAGATTCAAAAGCCGTGT    | CTAGTTTTGCCGGTCTTTGC     |
| <i>SmRBOHE1</i> -qPCR | CCTTCATACTGGCAACACGA     | GACCAATGCGAGAAGGTGAT     |
| <i>SmRBOHE2</i> -qPCR | TGCCGATTTTCCTCAATGAT     | GTGATGGTGTTGGTGCTACG     |
| <i>SmRBOHH1</i> -qPCR | GTACGACCGATGTCCAGGAT     | GTGCAACGCCATTTCTTCTT     |
| <i>SmRBOHH2</i> -qPCR | ATCTCACCCAATTCGGTCCT     | GGTGAGAATGAAATGGGAACA    |
| <i>SmActin</i> -qPCR  | CACTTAGCACCTTCCAGCAGATGT | GTACAACAGCAGACCTGAGTTCCT |

**Table S4** The primer of *SmRBOHs*

| Gene name       | Forward primer (5'-3')       | Reverse primer (5'-3')          |
|-----------------|------------------------------|---------------------------------|
| <i>SmRBOHB</i>  | ATGGAGATCGAAAACACAAGGG       | TTAAAAATTTTCTTTATGAAATTCAAACCTT |
| <i>SmRBOHD</i>  | ATGATAGGTATGAAAGGAGAATCTCATG | TCAAAAATTTTCTTTATGGAAATCAAAA    |
| <i>SmRBOHE1</i> | ATGAGAAAAGTGTTCATCTCCTAGGAGC | TCAGAAGTACTCCTTGTGGAACTCG       |
| <i>SmRBOHH2</i> | ATGGCGGAATACCCTTTTCGA        | CTAGAAGTTCTCTTTGTGGAAGTTGAA     |
